# Supplementary material for: Engineering Therapeutic Strategies in Cancer Immunotherapy via Exogenous Delivery of Toll-like Receptor Agonists
Source: MDPI journal article supplement (doi:10.3390/pharmaceutics13091374), 2021-08-31
Supplement: s1 [file s1]

# Supplementary Material: Engineering Therapeutic Strategies in Cancer Immunotherapy via Exogenous Delivery of Toll-Like Receptor Agonists

Sehwan Jeong, Yunyoung Choi and Kyobum Kim

**Table S1.** Current clinical trials of TLR agonists with or without co-factors on cancer therapy.

| TLR | TLR agonist  | Phase     | Co-factors                                       | Conditions                                                                                                                                             | Status                                                                                    | Ref.        |             |
|-----|--------------|-----------|--------------------------------------------------|--------------------------------------------------------------------------------------------------------------------------------------------------------|-------------------------------------------------------------------------------------------|-------------|-------------|
| 3   | PolyICLC     | I         | Romidepsin, Focal Lesional Radiation             | Cutaneous T-cell Lymphoma                                                                                                                              | Terminated                                                                                | NCT02061449 |             |
|     |              | I, II     | NY-ESO-1 protein, Montanide                      | Melanoma                                                                                                                                               | Completed                                                                                 | NCT01079741 |             |
|     |              | I         | OC-L, Montanide                                  | Primary Ovarian Cancer, Fallopian Tube Cancer, Primary Peritoneal Cancer                                                                               | Terminated                                                                                | NCT02452775 |             |
|     |              | I, II     | Durvalumab, Tremelimumab                         | Head and Neck Squamous Cell Carcinoma, Breast Cancer and 9 more                                                                                        | Active, not recruiting                                                                    | NCT02643303 |             |
|     |              | I, II     | rhuFlt3L/CDX-301                                 | Low-Grade B-cell Lymphoma                                                                                                                              | Recruiting                                                                                | NCT01976585 |             |
|     |              | I, II     | 6MHP, NeoAg-mBRAF, CDX-1140                      | Melanoma                                                                                                                                               | Recruiting                                                                                | NCT04364230 |             |
|     | Rintatolimod | I, II     | Pembrolizumab, Cisplatin                         | Ovarian Cancer Recurrent                                                                                                                               | Recruiting                                                                                | NCT03734692 |             |
| 4   | G100         | I, II     | Pembrolizumab, Rituximab                         | Follicular Low Grade Non-Hodgkin's Lymphoma                                                                                                            | Terminated                                                                                | NCT02501473 |             |
|     | GLA-SE       | I         | .                                                | Stage III/IV Adult Soft Tissue Sarcoma,                                                                                                                | Completed                                                                                 | NCT02180698 |             |
|     |              | I         | MART-1 antigen                                   | Stage IIA/IIB/IIB/IIIA/IIIB/IIIC/IV Skin Melanoma                                                                                                      | Completed                                                                                 | NCT02320305 |             |
|     | GSK179509    | I         | .                                                | Cancer, Neoplasms                                                                                                                                      | Completed                                                                                 | NCT02798978 |             |
| 5   | Entolimod    | I         | .                                                | Unspecified Adult Solid Tumor, Protocol Specific                                                                                                       | Completed                                                                                 | NCT01527136 |             |
| 7   | BNT411       | I, II     | Atezolizumab (anti-PD-1), Carboplatin, Etoposide | Solid Tumor, Extensive-stage Small Cell Lung Cancer                                                                                                    | Recruiting                                                                                | NCT04101357 |             |
|     | DSP-0509     | I, II     | Pembrolizumab                                    | Neoplasms                                                                                                                                              | Recruiting                                                                                | NCT03416335 |             |
|     | Imiquimod    | II        | .                                                | Breast Cancer, Breast Neoplasms                                                                                                                        | Completed                                                                                 | NCT00899574 |             |
|     |              | I         | Indocyanine green solution                       | Melanoma, Metastatic Cancer                                                                                                                            | Completed                                                                                 | NCT00453050 |             |
|     |              | I         | Cyclophosphamide                                 | Breast Cancer, Metastatic Breast Cancer, Recurrent Breast Cancer                                                                                       | Completed                                                                                 | NCT01421017 |             |
|     |              | I         | Standard of Care PD-1 Therapy                    | Melanoma, Breast Cancer, Merkel Cell Carcinoma and 10 more                                                                                             | Recruiting                                                                                | NCT04116320 |             |
|     |              | RO7119929 | I                                                | Tocilizumab                                                                                                                                            | Carcinoma, Hepatocellular, Biliary Tract cancer, Secondary Liver Cancer, Liver Metastases | Recruiting  | NCT04338685 |
|     | SHR2150      | I, II     | anti-PD-1 antibody, anti-CD47                    | Solid Tumor                                                                                                                                            | Recruiting                                                                                | NCT04588324 |             |
|     | 8            | VTX-2337  | I, II                                            | .                                                                                                                                                      | Low Grade B Cell Lymphoma                                                                 | Terminated  | NCT01289210 |
|     |              |           | I                                                | PLDH, Paclitaxel                                                                                                                                       | Malignant Ovarian Mixed Epithelial Tumor, Ovarian Brenner Tumor and 8 more                | Completed   | NCT01294293 |
| I   |              |           | Cetuximab                                        | Metastatic Squamous Neck Cancer With Occult Primary Squamous Cell Carcinoma, Recurrent Metastatic Squamous Neck Cancer With Occult Primary and 39 more | Completed                                                                                 | NCT01334177 |             |
| II  |              |           | PLD                                              | Epithelial Ovarian Cancer, Fallopian Tube Cancer, Primary Peritoneal Cancer                                                                            | Completed                                                                                 | NCT01666444 |             |
| II  |              |           | Carboplatin, Cisplatin, 5-fluorouracil           | Carcinoma, Squamous Cell of Head and Neck                                                                                                              | Completed                                                                                 | NCT01836029 |             |
|     |              |           |                                                  |                                                                                                                                                        |                                                                                           |             |             |

|                          |                |             |                                                                                            |                                                                                                                               |                        |             |
|--------------------------|----------------|-------------|--------------------------------------------------------------------------------------------|-------------------------------------------------------------------------------------------------------------------------------|------------------------|-------------|
| 9                        |                | I           | Cyclophosphamide, Pegfilgrastim                                                            | Colorectal Adenocarcinoma, Metastatic Pancreatic Adenocarcinoma and 16 more                                                   | Terminated             | NCT02650635 |
|                          |                | I           | Nivolumab                                                                                  | Carcinoma, Squamous Cell                                                                                                      | Recruiting             | NCT03906526 |
|                          | CMP-001        | II          | Nivolumab                                                                                  | Melanoma, Lymph Node Cancer                                                                                                   | Active, not recruiting | NCT03618641 |
|                          |                | II          | Nivolumab                                                                                  | Melanoma                                                                                                                      | Recruiting             | NCT04401995 |
|                          | CPG 7909       | I, II       | .                                                                                          | Non-Hodgkin Lymphoma, Mycosis Fungoides                                                                                       | Completed              | NCT00185965 |
|                          | EMD 1201081    | I           | Cisplatin, Cetuximab                                                                       | Squamous Cell Carcinoma of the Head and Neck                                                                                  | Terminated             | NCT01360827 |
|                          | GNKG168        | I           | .                                                                                          | Relapsed Acute Lymphoblastic Leukemia, Relapsed Acute Myelogenous Leukemia                                                    | Terminated             | NCT01743807 |
|                          | MGN1703        | I           | Ipilimumab                                                                                 | Advanced Cancers, Melanoma                                                                                                    | Active, not recruiting | NCT02668770 |
|                          | SD-101         | I, II       | Ipilimumab                                                                                 | Extranodal Marginal Zone Bcell Lymphoma of Mucosa-associated Lymphoid Tissue, Nodal Marginal Zone B-cell Lymphoma, and 5 more | Completed              | NCT02254772 |
|                          |                | I           | BMS 986178 (Anti-OX40 Antibody)                                                            | Advanced Malignant Solid Neoplasm, Extracranial Solid Neoplasm, Metastatic Malignant Solid Neoplasm                           | Active, not recruiting | NCT03831295 |
|                          |                | I           | Anti-OX40 Antibody BMS 986178                                                              | B-Cell Non-Hodgkin Lymphoma, Grade 1/2/3a Follicular Lymphoma and 4 more                                                      | Recruiting             | NCT03410901 |
|                          |                | I           | Nivolumab                                                                                  | Metastatic Pancreatic Adenocarcinoma, Refractory Pancreatic Adenocarcinoma, Stage IV Pancreatic Cancer AJCC v8                | Recruiting             | NCT04050085 |
|                          |                | I           | Nivolumab, Ipilimumab                                                                      | Metastatic Uveal Melanoma in the Liver                                                                                        | Recruiting             | NCT04935229 |
|                          |                | I, II       | Ibrutinib                                                                                  | Grade 1/2/3a Follicular Lymphoma, Recurrent Follicular Lymphoma and 3 more                                                    | Recruiting             | NCT02927964 |
| Tilsotolimod             |                | I           | Ipilimumab, Nivolumab                                                                      | Advanced Cancer                                                                                                               | Active, not recruiting | NCT04270864 |
| VLP-encapsulated CMP-001 |                | II          | Pembrolizumab                                                                              | Clinical Stage III Cutaneous Melanoma AJCC v8, Melanoma of Unkown Primary and 4 more                                          | Recruiting             | NCT04708418 |
|                          | I, II          | INCAGN01949 | Locally Advanced Malignant Solid Neoplasm, Metastatic Pancreatic Adenocarcinoma and 2 more | Not yet recruiting                                                                                                            | NCT04387071            |             |
| 3, 7/8                   | PolyICLC, R848 | I, II       | Peptide Vaccine (LPV7) + Tetanus peptide, IFA                                              | Melanoma, metastatic melanoma, mucosal melanoma                                                                               | Active, not recruiting | NCT02126579 |
|                          |                | II          | Tumorlysate pulsed DC vaccination                                                          | Glioma, Anaplastic Astrocytoma, Anaplastic Astro-oligodendroglioma, Glioblastoma                                              | Active, not recruiting | NCT01204684 |
| 7/8                      | BDB018         | I           | Pembrolizumab                                                                              | Solid Tumor                                                                                                                   | Recruiting             | NCT04840394 |
|                          | BDC-1001       | I, II       | Pembrolizumab                                                                              | HER2 Positive Solid Tumors                                                                                                    | Recruiting             | NCT04278144 |
|                          | MEDI9197       | I           | Durvalumab                                                                                 | Solid Tumors, CTCL, Cancer                                                                                                    | Terminated             | NCT02556463 |
|                          | R848           | I           | .                                                                                          | Tumors                                                                                                                        | Completed              | NCT00821652 |
|                          |                | II          | Gp100, MAGE-3                                                                              | Melanoma                                                                                                                      | Completed              | NCT00960752 |
|                          | TransCon       | I, II       | Pembrolizumab                                                                              | Advanced Solid tumor, Locally Advanced Solid Tumor, Metastatic Solid Tumor                                                    | Recruiting             | NCT04799054 |

MART-1, melanoma antigen recognized by T-cells; R848, resiquimod; PLD, pegylated liposomal doxorubicin; Pegylated Liposomal Doxorubicin Hydrochloride (PLDH); VLP, virus-like particles; AJCC, American Joint Committee on Cancer.
